# Supplementary material
Source: PubMed Central journal article supplement (PMC2154448)
Supplement: supp_0704816105_04816Table1.pdf [file supp_0704816105_04816Table1.pdf]

**Table 1. Molecular diversity statistics for the seven maximally differentiated mitochondrial haplogroups defined by SAMOVA**

| Haplogroup<br>( <i>k</i> = 7) | Sites<br>( <i>n</i> = 20)     | Average<br>pairwise<br>diffs. | Nucleotide<br>diversity $\pi$ | Coalescent $\theta$<br>3 runs, $\pm$ SD  | Growth parameter estimate<br>( <i>g</i> )             | Tajima's <i>D</i>              | Fu's <i>F</i>                  |
|-------------------------------|-------------------------------|-------------------------------|-------------------------------|------------------------------------------|-------------------------------------------------------|--------------------------------|--------------------------------|
| A<br>( <i>n</i> = 12)         | 28, 29                        | 1.894<br>$\pm$ 1.160          | 0.008<br>$\pm$ 0.005          | (0.084) – (0.099)<br>$\pm$ 0.016 - 0.019 | (-2.941) – (-3.773)<br>$\pm$ 0.490 – 0.665            | -1.138<br>( <i>P</i> = 0.150)  | -1.475<br>( <i>P</i> = 0.130)  |
| B<br>( <i>n</i> = 16)         | 25-27                         | 1.492<br>$\pm$ 0.949          | 0.006<br>$\pm$ 0.005          | (0.067) – (0.092)<br>$\pm$ 0.017 - 0.029 | (544.6) – (630.3) <sup>†</sup><br>$\pm$ 52.21 – 137.0 | -1.032<br>( <i>P</i> = 0.165)  | -2.659<br>( <i>P</i> = 0.027)* |
| C1/2<br>( <i>n</i> = 33)      | 1-4                           | 5.915<br>$\pm$ 2.897          | 0.028<br>$\pm$ 0.015          | (0.053) – (0.058)<br>$\pm$ 0.008 - 0.009 | (-1.811) – (0.323)<br>$\pm$ 8.523 – 8.622             | -1.608<br>( <i>P</i> = 0.032)* | -2.789<br>( <i>P</i> = 0.159)  |
| D1<br>( <i>n</i> = 15)        | 5, 6                          | 3.790<br>$\pm$ 2.021          | 0.016<br>$\pm$ 0.010          | (0.014) – (0.016)<br>$\pm$ 0.004         | (-9.431) – (3.076)<br>$\pm$ 41.82 – 45.10             | 0.464<br>( <i>P</i> = 0.740)   | 1.992<br>( <i>P</i> = 0.839)   |
| D2<br>( <i>n</i> = 19)        | 23                            | 1.743<br>$\pm$ 1.059          | 0.008<br>$\pm$ 0.005          | (0.013) – (0.018)<br>$\pm$ 0.004 - 0.006 | (216.8) – (327.4)<br>$\pm$ 141.9 – 157.0              | -0.434<br>( <i>P</i> = 0.389)  | -0.742<br>( <i>P</i> = 0.338)  |
| D3<br>( <i>n</i> = 44)        | 8, 12-14,<br>16,18,<br>20, 24 | 0.984<br>$\pm$ 0.679          | 0.004<br>$\pm$ 0.003          | (0.025) – (0.180)<br>$\pm$ 0.005 - 0.019 | (389.8) – (1722) <sup>†</sup><br>$\pm$ 63.47 – 188.2  | -1.820<br>( <i>P</i> = 0.015)* | -4.490<br>( <i>P</i> = 0.006)* |
| Ivindo<br>( <i>n</i> = 8)     | 19                            | 13.821<br>$\pm$ 6.956         | 0.059<br>$\pm$ 0.034          | (0.027)<br>$\pm$ 0.007                   | (-20.40) – (-21.13)<br>$\pm$ 12.46 – 12.68            | -1.129<br>( <i>P</i> = 0.918)  | 7.986<br>( <i>P</i> = 0.995)   |

\*Value significant at  $P \leq 0.05$ .

† Standard deviation is greater than three times the magnitude of the growth parameter estimate.
