# Supplementary material
Source: PubMed Central journal article supplement (PMC2154448)
Supplement: supp_0704816105_04816Table2.pdf [file supp_0704816105_04816Table2.pdf]

**Table 2. Microsatellite diversity statistics for gorilla samples belonging to the four major mitochondrial haplogroups (A-D)**

| Sites                  | Haplogroup | Total no. samples | Multi-locus genotypes | Mean observed heterozygosity | Mean expected heterozygosity | No. private alleles | Mean no. alleles/locus |
|------------------------|------------|-------------------|-----------------------|------------------------------|------------------------------|---------------------|------------------------|
| Bwindi, Uganda (28)    | A          | 18                | 10                    | 0.762 ± 0.062                | 0.756 ± 0.037                | 4                   | 3.86 ± 0.90            |
| K-Biega, D.R.C. (25)   | B          | 32                | 17                    | 0.702 ± 0.044                | 0.650 ± 0.047                | 1                   | 4.00 ± 0.82            |
| Afi Mts., Nigeria (1)  | C1         | 16                | 8                     | 0.718 ± 0.068                | 0.706 ± 0.022                | 3                   | 3.57 ± 0.53            |
| Bai Hokou, C.A.R. (23) | D2         | 40                | 15                    | 0.721 ± 0.047                | 0.755 ± 0.029                | 3                   | 5.86 ± 2.54            |
| Lope, Gabon (12)       | D3         | 72                | 34                    | 0.692 ± 0.034                | 0.764 ± 0.030                | 3                   | 7.00 ± 2.58            |
| Lossi, Congo (24)      | D3         | 16                | 7                     | 0.664 ± 0.070                | 0.764 ± 0.025                | 0                   | 4.86 ± 0.90            |
