# Supplementary material
Source: PubMed Central journal article supplement (PMC2154448)
Supplement: supp_0704816105_04816Table3.pdf [file supp_0704816105_04816Table3.pdf]

**Table 3. List of sample sites, country of origin, site code, site number for all gorilla populations examined in this study**

| Site                      | Country           | Sub-spp* | Site code | Site no. | Sample size |
|---------------------------|-------------------|----------|-----------|----------|-------------|
| Afi Mts./Cross River      | Nigeria           | WLG      | CRS       | 1        | 9           |
| Yabassi Forest            | Cameroon          | WLG      | YAB       | 2        | 7           |
| Dja                       | Cameroon          | WLG      | DJA       | 3        | 6           |
| Lobéké                    | Cameroon          | WLG      | LBK       | 4        | 11          |
| Mont Alen                 | Equatorial Guinea | WLG      | EQG       | 5        | 8           |
| Monts de Cristal          | Gabon             | WLG      | MCR       | 6        | 7           |
| Petit Loango <sup>†</sup> | Gabon             | WLG      | PLO       | 7        | 1           |
| Loango <sup>†</sup>       | Gabon             | WLG      | LOA       | 7        | 1           |
| Rabi                      | Gabon             | WLG      | RAB       | 8        | 4           |
| Mayumba <sup>†</sup>      | Gabon             | WLG      | MYB       | 9        | 1           |
| Conkouati <sup>†</sup>    | Congo             | WLG      | CQT       | 10       | 1           |
| Mont Doudou <sup>†</sup>  | Gabon             | WLG      | MTD       | 11       | 1           |
| Lopé Reserve              | Gabon             | WLG      | LOP       | 12       | 8           |
| Mikongo                   | Gabon             | WLG      | MIK       | 13       | 3           |
| Massif du Chaillu         | Gabon             | WLG      | MFC       | 14       | 4           |
| Bakoumba <sup>†</sup>     | Gabon             | WLG      | BKB       | 15       | 2           |
| Lastourville              | Gabon             | WLG      | LAS       | 16       | 7           |
| Itombe <sup>†</sup>       | Gabon             | WLG      | ITO       | 17       | 1           |
| Langoué                   | Gabon             | WLG      | LAN       | 18       | 5           |
| Ivindo                    | Gabon             | WLG      | IPS       | 19       | 8           |
| Belinga                   | Gabon             | WLG      | BEL       | 20       | 3           |
| Minkébé <sup>†</sup>      | Gabon             | WLG      | MKB       | 21       | 1           |
| Ndoki <sup>†</sup>        | Congo             | WLG      | NDK       | 22       | 1           |
| Bai Hokou                 | C.A.R.            | WLG      | CAR       | 23       | 19          |
| Lossi                     | Congo             | WLG      | LOS       | 24       | 10          |
| Kahuzi-Biega              | D.R.C.            | ELG      | KBG       | 25       | 11          |
| Tshiambero <sup>†</sup>   | D.R.C.            | ELG      | TSH       | 26       | 2           |
| Itombwe                   | D.R.C.            | ELG      | ITW       | 27       | 5           |
| Bwindi                    | Uganda            | MTG      | BWD       | 28       | 9           |
| Karisoke                  | Rwanda            | MTG      | RWD       | 29       | 3           |
| Rok <sup>†</sup>          | Captive           | WLG      | ROK       |          | 1           |
| Mukisi <sup>†</sup>       | Captive           | ELG      | MUK       |          | 2           |
| CDP <sup>†</sup>          | Gabon             | WLG      | CDP       |          | 2           |
| Belar <sup>†</sup>        | Cameroon          | WLG      | CAM       |          | 1           |
| Uele <sup>†</sup>         | D.R.C.            | WLG      | UEL       |          | 1           |

\*Gorilla subspecies: WLG, Western lowland gorilla; ELG, Eastern lowland gorilla; MTG, Mountain gorilla.

<sup>†</sup>Sequences from the original dataset (1) or a previous study of gorilla HV1 variation (2) that were excluded from population genetic analyses.

1. Clifford SL, Anthony NM, Bawe-Johnson M, Abernethy KA, Tutin CEG, White LTJ, Bermejo M, Goldsmith ML, McFarland K, Jeffery K, *et al.* (2004) *Mol Ecol* 13:1551-1567.
2. Thalmann O, Hebler J, Poinar HN, Pääbo S, Vigilant L (2004) *Mol Ecol* 13:321-335.
