# Supplementary material
Source: PubMed Central journal article supplement (PMC2154448)

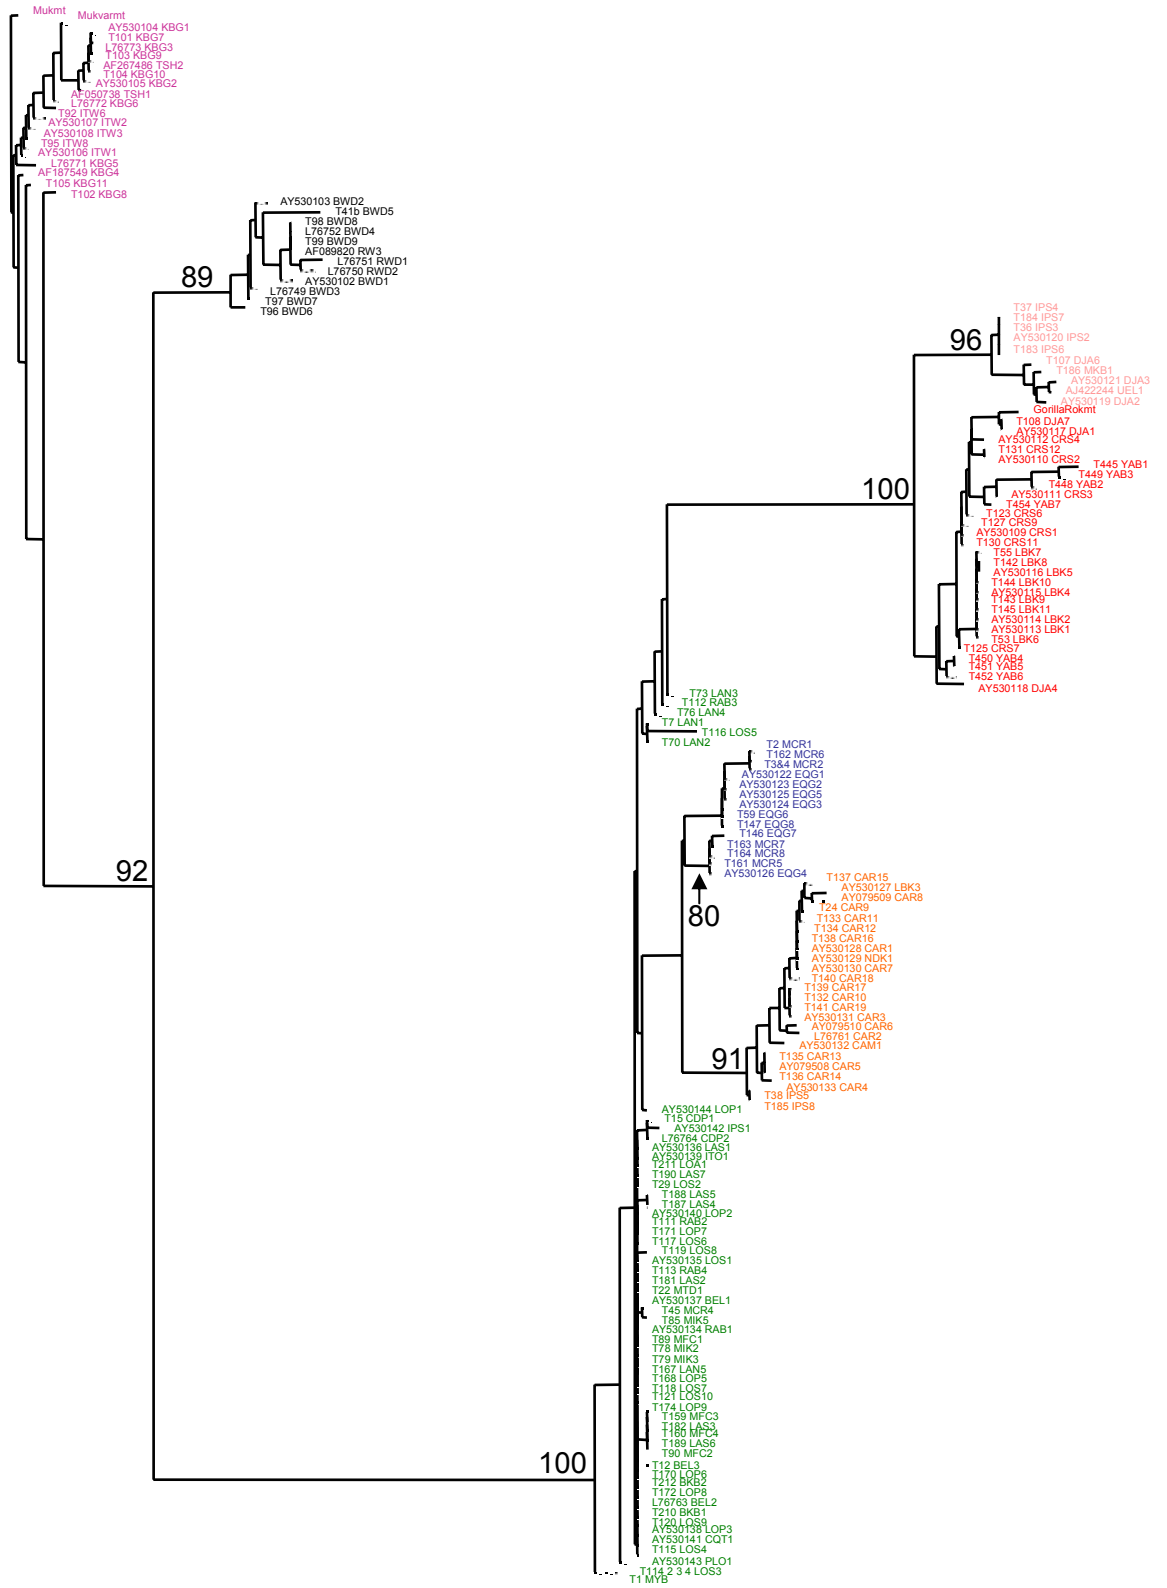

· 0.001 substitutions/site

Supplement: supp_0704816105_04816Fig4.pdf [file supp_0704816105_04816Fig4.pdf]

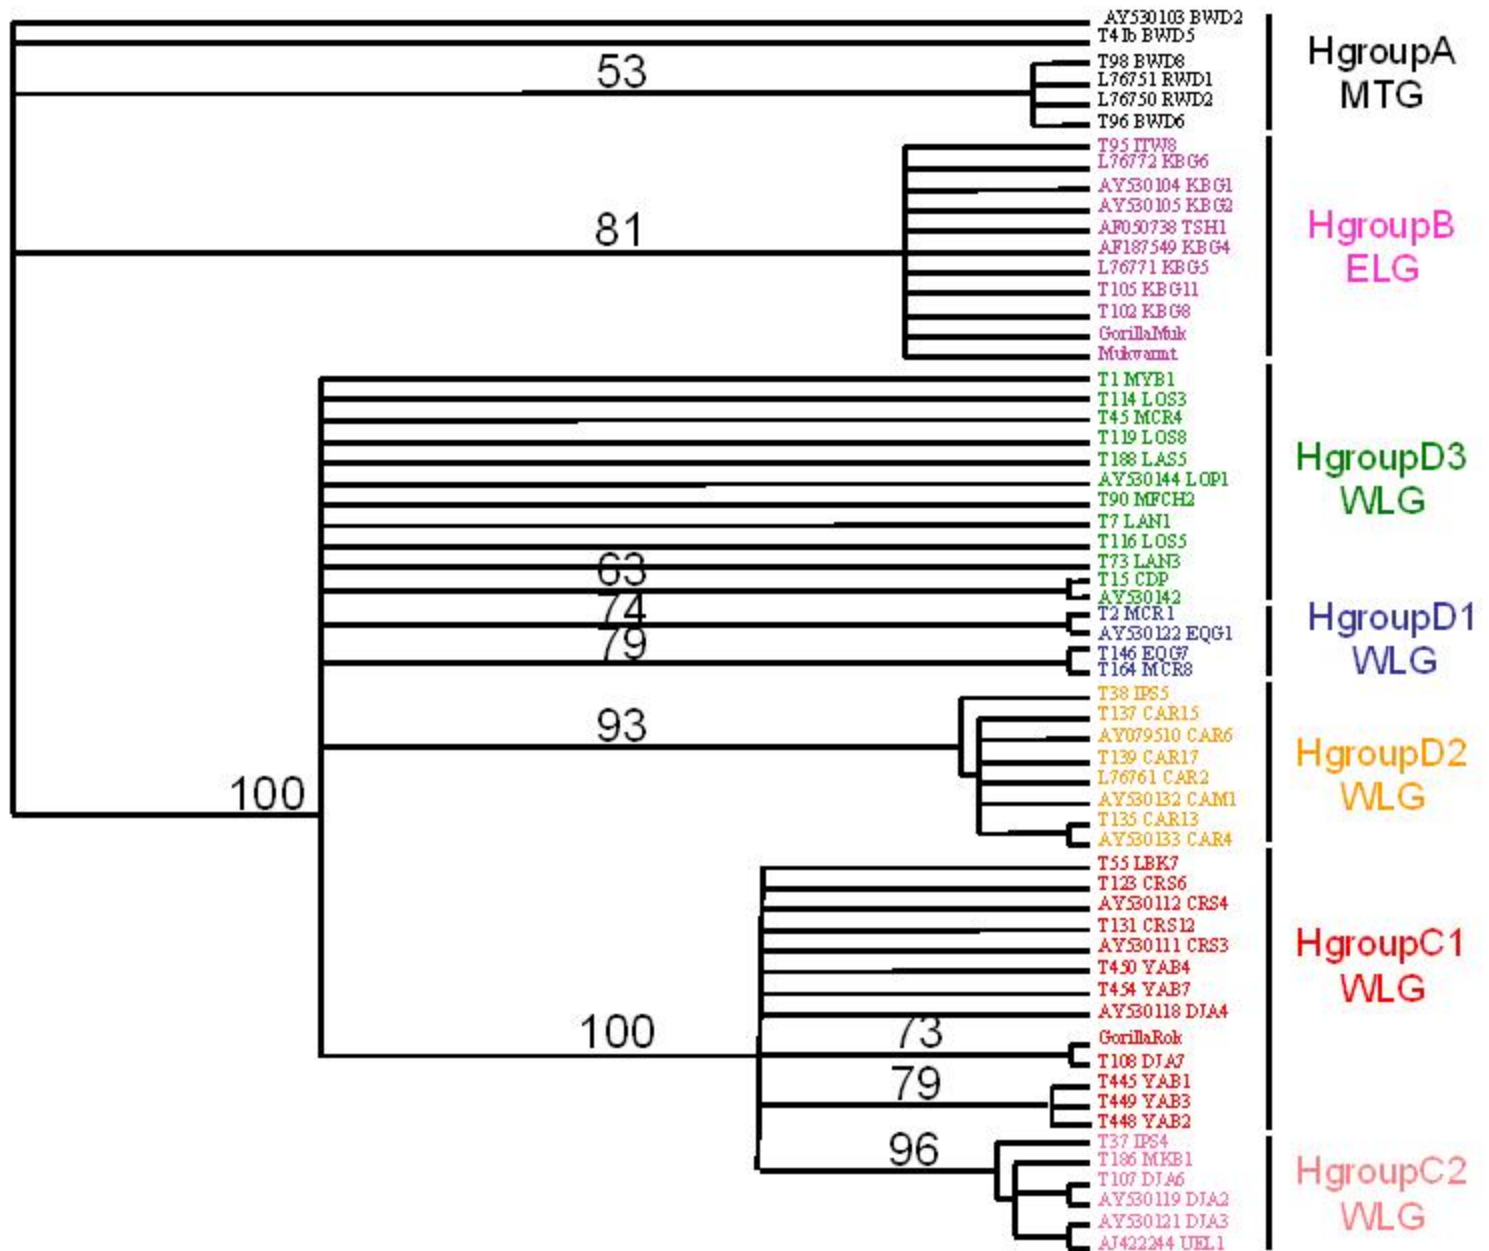

Supplement: supp_0704816105_04816Fig5.pdf [file supp_0704816105_04816Fig5.pdf]

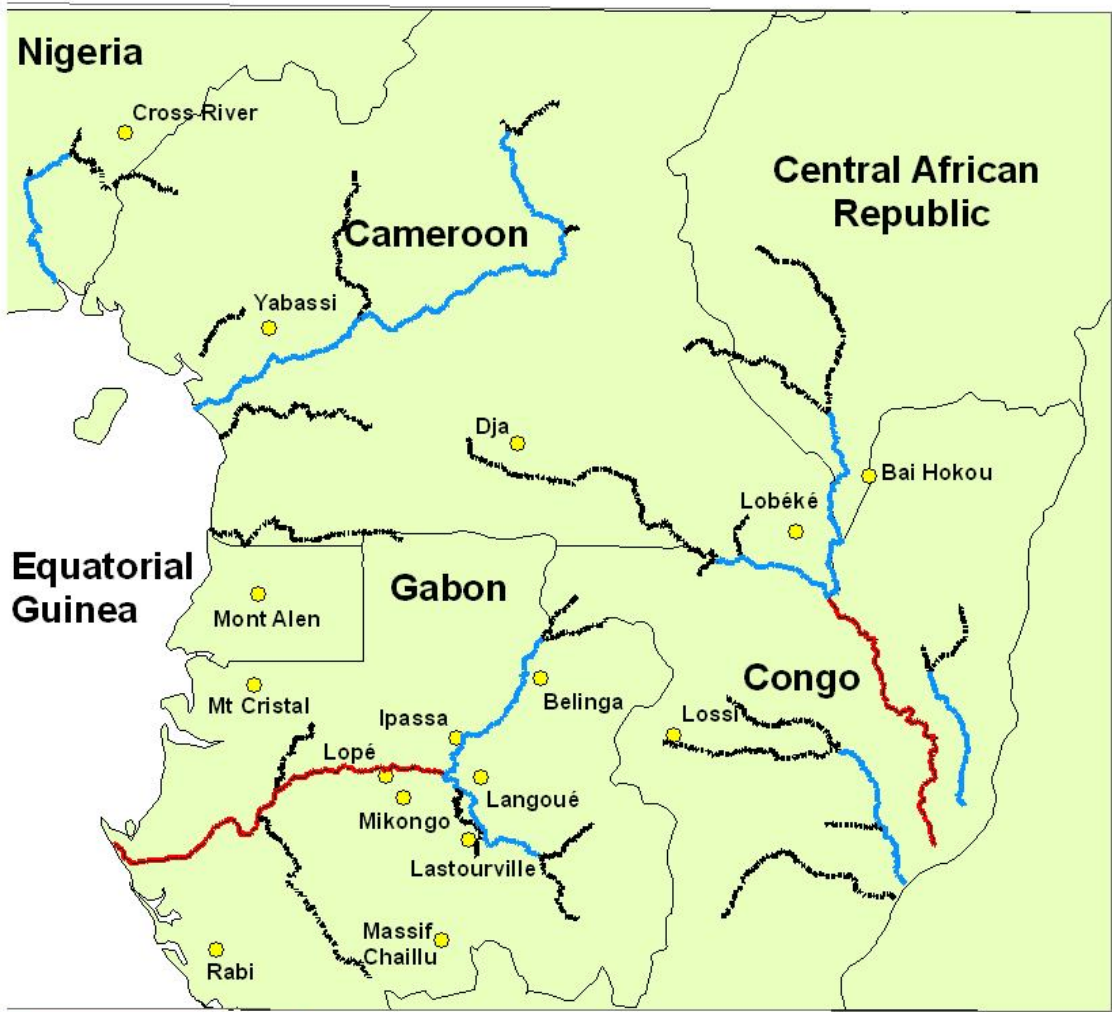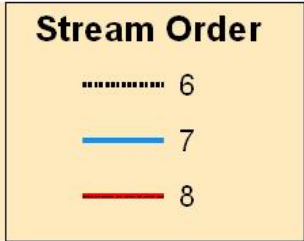

Supplement: supp_0704816105_04816Fig6.pdf [file supp_0704816105_04816Fig6.pdf]
